# Supplementary material
Source: ML conference proceedings conference paper supplement (https://openreview.net/forum?id=SFNqrHQTEP)
Supplement: supplementary_material [file attachment]

## Sheet: Feature_set
Ra	feed_rate	wheel_speed	work_speed	power_sensor__peak_power	power_sensor__mean_power	power_sensor__std	power_sensor__skewness	power_sensor__kurtosis	power_sensor__peak2peak	acceleration_normal__peak_mag	acceleration_normal__mean	acceleration_normal__skewness	acceleration_normal__kurtosis	acceleration_normal__total_energy	acceleration_normal__energy_band1	acceleration_normal__energy_band2	acceleration_tangential__peak_mag	acceleration_tangential__mean	acceleration_tangential__skewness	acceleration_tangential__kurtosis	acceleration_tangential__total_energy	acceleration_tangential__energy_band1	acceleration_tangential__energy_band2
0.419	0.4	45	100	4.72956	3.71128	1.00376	-1.37423	3.83534	4.00332	5.36741	0.82796	0.135797	3.34511	8.04668e+09	8.0221e+08	7.35949e+08	3.53348	0.430035	0.0078096	4.66725	2.43091e+09	1.19894e+08	8.69683e+08
0.394	0.2	45	100	3.08029	2.53502	0.349559	-0.937436	3.73182	1.80976	3.30866	0.601609	0.175668	3.05627	5.04288e+09	1.03099e+09	4.48367e+08	2.62462	0.33887	0.00774881	4.52974	1.75228e+09	8.85365e+07	6.40045e+08
0.265	0.01	45	100	1.70604	1.23799	0.252736	-0.124903	1.59297	0.947364	0.886051	0.155969	-0.0215841	3.0125	1.46252e+09	2.37962e+08	9.34938e+07	0.373755	0.0510747	-0.0225039	3.32069	1.60553e+08	9.25418e+06	4.35522e+07
0.207	0	45	100	1.71507	1.20229	0.255226	-0.181819	1.6842	1.03397	0.679782	0.144223	-0.0523734	2.88279	4.63383e+08	4.6476e+07	2.9535e+07	0.351711	0.0418072	-0.00395673	3.13966	3.96108e+07	2.22566e+06	8.76058e+06
0.583	1.2	45	100	11.6128	10.1831	1.84575	-2.49747	8.82446	9.43639	10.1111	1.64453	0.0818924	3.52382	3.68639e+10	1.68121e+09	2.4975e+09	5.15661	0.751588	-0.0108729	3.69281	7.90606e+09	1.51625e+08	2.77546e+09
0.474	0.2	45	100	3.16362	2.53092	0.461246	-1.64255	5.6442	2.3171	3.86651	0.65126	0.147877	3.11715	1.11292e+10	2.18253e+09	1.02066e+09	2.79992	0.368117	-0.0137344	4.47495	3.92601e+09	1.41266e+08	1.512e+09
0.33	0.01	45	100	1.69372	1.24778	0.255037	-0.270127	1.70339	1.00934	0.864151	0.154402	0.00878595	3.01379	1.34042e+09	2.24206e+08	8.52878e+07	0.306275	0.0507129	-0.0221239	3.1298	1.46275e+08	8.42173e+06	3.60095e+07
0.293	0	45	100	1.6026	1.19349	0.251789	-0.215179	1.59782	0.905496	0.68342	0.142955	-0.046196	2.925	3.45485e+08	4.15193e+07	1.92714e+07	0.220165	0.0388979	-0.0197073	3.08838	2.59735e+07	1.86848e+06	4.58004e+06
0.511	0.4	45	100	4.53623	3.57064	0.834575	-1.44181	4.20209	3.63718	4.97491	0.787383	0.133755	3.4044	6.95559e+09	9.42245e+08	7.14749e+08	3.39729	0.449994	-0.0169293	4.40783	2.48695e+09	5.03306e+07	9.31243e+08
0.409	0.4	45	100	4.3507	3.6967	0.572578	-1.64388	5.38079	2.87945	5.22001	0.826252	0.12894	3.2354	9.91405e+09	1.34871e+09	8.98637e+08	2.9046	0.438689	-0.00981579	3.7424	2.96357e+09	8.95092e+07	1.05476e+09
0.3	0.01	45	100	1.67854	1.24797	0.257666	-0.313296	1.65213	0.950648	1.0079	0.149734	0.0136304	3.09928	1.2115e+09	2.38743e+08	6.5579e+07	0.326047	0.0515234	-0.0181679	3.24214	1.44554e+08	1.11739e+07	2.63325e+07
0.289	0	45	100	1.64077	1.20595	0.259651	-0.293996	1.67783	0.951879	0.640413	0.130277	-0.0491304	2.96648	3.27569e+08	4.78795e+07	2.17551e+07	0.259518	0.0443981	-0.0177094	3.17194	3.86904e+07	3.21383e+06	6.58579e+06
0.76	1.2	45	100	10.7488	9.58759	1.61998	-2.52675	8.94606	8.51199	9.805	1.57423	0.0802522	3.37204	3.29414e+10	2.07309e+09	2.49717e+09	4.00763	0.715816	-0.022977	3.40193	7.01191e+09	1.6856e+08	2.33716e+09
0.479	0.4	45	100	4.08677	3.48142	0.522479	-1.65582	5.66372	2.87616	4.56522	0.81156	0.129041	3.0671	9.45902e+09	1.66204e+09	8.84127e+08	2.73254	0.439063	-0.0380527	3.73106	2.9584e+09	1.06636e+08	9.53039e+08
0.358	0.01	45	100	1.68387	1.25099	0.255933	-0.202157	1.64789	0.999083	1.35978	0.152515	0.00531649	3.30886	1.42082e+09	2.54372e+08	7.35751e+07	0.380052	0.0513932	-0.0183648	3.41294	1.62417e+08	1.28412e+07	2.61151e+07
0.264	0	45	100	1.6104	1.19536	0.254302	-0.223071	1.63646	0.863628	0.609027	0.127495	-0.0570284	2.96532	2.78334e+08	3.8009e+07	1.9648e+07	0.29142	0.0448062	-0.0127293	3.2369	3.5134e+07	2.98751e+06	5.28372e+06
0.51	0.4	45	100	4.10524	3.34984	0.685713	-1.52196	4.66083	3.25297	4.37203	0.789655	0.131854	3.11103	6.71635e+09	1.17801e+09	6.19245e+08	3.4753	0.483082	-0.0614363	3.8777	2.64706e+09	2.71916e+08	7.50306e+08
0.495	0.2	45	100	2.80856	2.34194	0.299409	-0.591239	2.90447	1.45594	3.1108	0.610442	0.165567	2.93294	4.87828e+09	1.27608e+09	3.49357e+08	2.59433	0.354932	0.00126935	3.68991	1.72761e+09	2.08672e+08	4.95709e+08
0.453	0.05	45	100	1.9671	1.45619	0.255774	-0.199685	1.72844	1.19816	1.71337	0.264093	0.101357	3.13435	4.26945e+09	1.32664e+09	1.72576e+08	0.763925	0.121399	0.0426139	3.30489	9.15418e+08	1.56743e+08	1.94545e+08
0.316	0	45	100	1.69414	1.20642	0.25391	-0.00689989	1.5869	0.925199	0.790663	0.132353	-0.0233128	2.99688	3.07589e+08	4.84484e+07	1.34955e+07	0.435359	0.0422909	0.0020587	3.66592	3.2455e+07	2.56546e+06	7.95089e+06
1.114	1.2	25	100	12.1194	9.9661	2.77418	-1.72053	4.91959	11.2211	10.3145	2.76193	0.0810335	3.25198	1.12968e+11	3.86241e+09	4.68322e+09	7.03798	1.33697	0.0175989	3.28069	2.63454e+10	1.44386e+09	5.72007e+09
0.738	0.2	25	100	2.4022	1.84313	0.395551	-0.862893	3.39532	1.91402	4.1306	0.754045	0.0331695	3.16996	8.7051e+09	8.986e+08	6.44023e+08	2.62987	0.453944	0.0801821	3.21126	3.14753e+09	3.64461e+08	5.15703e+08
0.518	0.05	25	100	1.39901	0.990533	0.259464	-0.199712	1.67192	1.01509	1.53325	0.27346	-0.0568586	3.09235	4.66613e+09	5.67678e+08	3.27033e+08	1.17704	0.169539	0.129223	3.30702	1.79841e+09	1.72248e+08	2.33882e+08
0.355	0	25	100	1.12728	0.726178	0.261784	-0.188803	1.56232	0.837768	0.433383	0.0566291	-0.0572521	4.2949	5.7018e+07	5.63195e+06	2.76646e+06	0.370429	0.0333262	0.114884	4.30974	1.95949e+07	1.93173e+06	1.70007e+06
0.774	0.4	25	100	3.84705	2.86721	0.788399	-1.13127	3.33466	3.34779	5.99596	1.14568	0.0138017	3.17166	1.2965e+10	1.09122e+09	1.00813e+09	3.84415	0.647065	0.0811232	3.3821	4.19449e+09	4.1215e+08	7.12229e+08
0.761	0.4	25	100	3.77891	2.90132	0.758883	-1.34064	3.99212	3.40197	5.76852	1.16908	0.0236418	3.09783	2.18043e+10	1.88532e+09	1.6287e+09	3.60272	0.6512	0.0532384	3.34246	6.91019e+09	6.55999e+08	1.32539e+09
0.5	0.05	25	100	1.51599	0.989541	0.258764	-0.136913	1.66549	1.22115	1.50919	0.287989	-0.0735302	2.95335	5.95765e+09	8.24074e+08	4.89452e+08	1.07284	0.173318	0.0912103	3.06708	2.15045e+09	2.07975e+08	3.09036e+08
0.427	0	25	100	1.13343	0.728705	0.257596	-0.101143	1.54895	0.832432	0.438601	0.047566	-0.0594996	4.20652	4.75671e+07	5.79446e+06	2.17891e+06	0.277915	0.0271454	0.0679435	4.26503	1.54144e+07	1.72468e+06	1.04747e+06
0.827	1.2	25	100	12.0225	10.8431	0.886926	-2.1172	10.2396	6.87137	10.3145	4.04308	0.115837	2.4605	1.51448e+11	6.96205e+09	7.4445e+09	8.53774	1.92252	0.1023	2.99184	3.55389e+10	2.11672e+09	7.44036e+09
0.701	0.4	25	100	3.62704	2.80856	0.75298	-1.39577	4.08989	3.24476	9.51575	1.64255	0.10275	3.20775	4.54861e+10	5.43825e+09	2.71505e+09	4.60995	0.823812	-0.0344604	3.40491	1.16963e+10	1.79071e+09	2.3172e+09
0.494	0.05	25	100	1.51804	1.0642	0.258244	-0.121702	1.67531	1.16409	2.69007	0.479287	0.081174	3.28351	1.6719e+10	3.19302e+09	9.41702e+08	1.57402	0.266991	-0.0610677	3.32903	5.21082e+09	8.552e+08	7.18981e+08
0.348	0	25	100	1.13138	0.716494	0.259177	-0.0618592	1.55538	0.835716	0.44069	0.0423911	-0.01194	4.80362	4.97257e+07	7.08861e+06	2.30682e+06	0.2745	0.0235505	0.0480859	4.17577	1.46757e+07	1.93086e+06	1.21338e+06
0.847	0.4	25	300	3.46778	2.25377	0.905627	-0.618	1.97375	3.26816	9.84195	1.22535	0.118988	4.16193	3.12384e+10	4.01083e+09	1.68836e+09	4.33678	0.617747	-0.0279102	4.15791	7.98015e+09	1.41102e+09	1.39697e+09
0.624	0.2	25	300	2.3201	1.72763	0.354506	-0.563914	3.08827	1.733	5.91173	1.04747	0.161991	3.16992	1.72615e+10	3.44509e+09	7.3071e+08	2.94925	0.547566	-0.067344	3.30804	4.77635e+09	1.08701e+09	5.59482e+08
0.435	0.01	25	300	1.24467	0.77894	0.2614	-0.13277	1.64422	0.937102	1.28517	0.15375	0.0103361	4.29643	1.36495e+09	2.62846e+08	5.35841e+07	0.664295	0.0805485	-0.0104536	4.33562	3.70111e+08	6.0126e+07	3.80572e+07
0.303	0	25	300	1.22251	0.713391	0.26396	-0.0952629	1.64681	0.959678	0.522039	0.040526	-0.024349	6.80751	5.06638e+07	7.94572e+06	2.68351e+06	0.291469	0.0267774	0.0237092	4.71881	2.00097e+07	3.5656e+06	1.39247e+06
1.48	1.2	25	300	8.2272	6.69933	1.82728	-1.87636	5.54262	7.90691	10.3145	2.87854	0.065039	3.13464	1.22695e+11	8.19229e+09	6.01564e+09	9.60889	1.31911	-0.000657314	3.56591	2.6242e+10	2.42751e+09	6.33864e+09
0.613	0.2	25	300	2.20927	1.40076	0.510361	-0.479224	2.20391	1.97354	6.57752	0.790644	0.176435	4.82248	3.38285e+10	7.50108e+09	1.47834e+09	3.43955	0.40443	-0.0811215	5.34226	8.9762e+09	2.13229e+09	1.20832e+09
0.455	0.01	25	300	1.24098	0.760431	0.264707	-0.188736	1.66944	0.963783	2.8932	0.138067	0.112539	12.5024	1.54911e+09	3.0092e+08	5.79084e+07	1.16778	0.0715388	-0.0408313	8.90649	3.84562e+08	7.47763e+07	3.93476e+07
0.385	0	25	300	1.12153	0.70756	0.26092	-0.0802627	1.58893	0.837358	0.410614	0.0431571	0.017026	4.20493	4.03974e+07	6.11274e+06	2.17288e+06	0.188393	0.0250196	0.0113776	3.65297	1.31734e+07	2.15503e+06	946905
0.85	0.4	25	300	3.20384	2.36444	0.596852	-1.10084	3.66145	2.81623	8.32463	1.59273	0.109888	3.2242	2.65948e+10	4.97412e+09	1.32881e+09	4.41434	0.773324	-0.0206248	3.51692	6.42223e+09	1.42531e+09	1.00945e+09
0.794	0.4	25	300	3.2609	2.52783	0.480581	-1.08264	3.93787	2.43573	8.6868	1.73173	0.095075	3.05159	4.16071e+10	7.90118e+09	1.83936e+09	4.29458	0.811392	-0.0214953	3.31634	9.37137e+09	2.14104e+09	1.46118e+09
0.457	0.01	25	300	1.29557	0.771337	0.265034	-0.128712	1.67459	1.00688	2.20351	0.147984	0.0444633	7.28886	1.56696e+09	3.4647e+08	6.91376e+07	1.27891	0.0773902	0.0303156	6.63309	4.07483e+08	9.31657e+07	4.71735e+07
0.489	0	25	300	1.11373	0.716268	0.262768	-0.148267	1.6074	0.831611	1.49281	0.0673003	0.10481	15.978	1.09838e+08	2.21265e+07	3.35809e+06	0.626378	0.0379075	-0.00226893	10.8479	2.95039e+07	7.19666e+06	1.80594e+06
1.192	1.2	25	300	8.16768	6.765	1.55413	-1.88777	5.76008	7.21363	10.3145	2.91747	0.0492782	2.90212	1.12972e+11	9.39129e+09	5.28807e+09	8.23656	1.32038	-0.000514659	3.31288	2.38237e+10	2.77625e+09	5.23529e+09
0.965	0.4	25	300	3.1628	2.5069	0.538567	-1.33732	4.48328	2.64384	8.37009	1.7768	0.147078	3.09151	4.96538e+10	1.24181e+10	1.69885e+09	4.76544	0.878294	-0.0407626	3.33747	1.2429e+10	3.42638e+09	1.51979e+09
0.442	0.01	25	300	1.18597	0.755347	0.262755	-0.117375	1.61749	0.906727	2.03951	0.135009	0.0804019	9.64393	9.41106e+08	2.27106e+08	3.7538e+07	1.11197	0.071033	0.00282371	7.53308	2.35987e+08	5.60328e+07	2.42999e+07
0.364	0	25	300	1.13097	0.706962	0.266925	-0.226566	1.64425	0.904264	0.406845	0.0456384	-0.0201268	3.9571	4.53684e+07	6.33335e+06	2.0072e+06	0.224038	0.0261456	0.00454911	3.72552	1.46426e+07	2.61785e+06	897047
0.576	0.4	25	300	5.0407	3.69654	1.2716	-1.10211	2.9431	4.67115	10.0622	1.7828	0.0272194	3.44016	4.55685e+10	2.71064e+09	2.34436e+09	5.67529	0.790214	0.0611068	3.73479	8.96968e+09	7.83423e+08	1.99277e+09
0.498	0.2	25	300	3.09671	2.23089	0.551499	-0.786581	2.94127	2.56297	6.9149	1.30475	0.053183	3.17192	2.79852e+10	3.59633e+09	1.52661e+09	3.53151	0.629492	0.0418498	3.28806	6.5418e+09	1.18494e+09	1.09584e+09
0.389	0.05	25	300	1.60753	1.14112	0.277256	-0.408292	1.98812	1.20555	3.98232	0.638281	0.138058	3.44051	2.805e+10	5.8133e+09	1.46343e+09	2.17162	0.330993	0.0394289	3.38012	7.54522e+09	1.56854e+09	9.29301e+08
0.241	0	25	300	1.19541	0.754548	0.260727	-0.285779	1.70511	0.928072	2.04205	0.149693	0.108717	8.16221	5.63643e+08	9.81031e+07	2.76123e+07	0.897739	0.0790489	0.0118671	7.24617	1.53833e+08	2.43468e+07	1.5441e+07
1.081	1.2	25	300	10.1889	8.08744	2.38285	-1.80303	5.23843	9.85626	10.3145	2.93588	0.0152141	3.12875	1.402e+11	7.18435e+09	7.77575e+09	8.25189	1.31156	0.0483353	3.46907	2.84378e+10	2.25836e+09	6.71113e+09
0.675	0.2	25	300	2.54668	1.88956	0.411578	-0.640377	2.76936	1.91936	7.12538	1.26778	0.146747	3.19886	2.5962e+10	4.88085e+09	1.42144e+09	3.67748	0.63805	0.0400097	3.47261	6.70462e+09	1.42312e+09	1.05704e+09
0.453	0.05	25	300	1.48562	1.0119	0.270348	-0.388012	1.88113	1.11525	4.8496	0.51233	0.172518	4.08337	2.00259e+10	4.7504e+09	9.57555e+08	2.33739	0.266772	0.0523958	4.12565	5.3891e+09	1.15354e+09	6.86661e+08
0.328	0	25	300	1.13343	0.740782	0.260082	-0.295377	1.68468	0.858292	1.75414	0.126198	0.0729317	6.93304	3.16307e+08	5.68544e+07	1.58946e+07	0.717224	0.0684424	0.0675404	5.8264	8.77986e+07	1.34348e+07	1.08056e+07
0.747	0.4	25	300	3.7313	2.77153	0.778508	-1.13967	3.50875	3.40362	9.08002	1.70503	0.0960219	3.2334	4.0386e+10	5.39152e+09	2.06595e+09	5.04574	0.805998	0.0242961	3.57814	9.30333e+09	1.82349e+09	1.53991e+09
0.741	0.4	25	300	3.63525	2.82316	0.65903	-1.35025	4.41624	3.21562	8.09487	1.66873	0.111488	3.16728	4.3615e+10	7.21309e+09	2.03159e+09	4.46754	0.762243	0.021593	3.3556	9.21683e+09	1.5394e+09	1.88863e+09
0.437	0.05	25	300	1.51066	0.997915	0.268972	-0.367337	1.84549	1.16573	4.10126	0.507293	0.16005	3.66663	1.92907e+10	5.71585e+09	7.53332e+08	7.23653	0.524006	0.0235086	16.9298	5.90555e+10	1.05465e+09	5.45889e+08
0.303	0	25	300	1.13918	0.725962	0.257001	-0.278962	1.68078	0.868143	1.18161	0.096978	0.0761252	6.77831	1.87866e+08	4.2912e+07	7.71076e+06	0.653711	0.0580833	0.103576	6.81541	6.60496e+07	2.27274e+07	1.37302e+06
1.249	1.2	25	300	8.93938	7.01837	2.0485	-1.80011	5.30155	8.67368	10.3145	2.97042	0.0711732	3.04123	1.40668e+11	9.67152e+09	6.323e+09	7.78873	1.14383	0.125947	3.51037	2.12591e+10	6.69935e+09	6.75315e+08
0.79	0.4	25	300	3.49035	2.61051	0.647285	-1.12781	3.70514	3.00669	9.28312	1.73234	0.166103	3.33697	4.91307e+10	9.69182e+09	2.09608e+09	4.97151	0.940678	0.125162	3.306	1.45053e+10	6.40883e+09	2.35702e+08
0.559	0.05	25	300	1.48521	0.932704	0.269007	-0.337212	1.86416	1.22977	4.26897	0.454618	0.126445	4.61141	1.61477e+10	4.92674e+09	5.882e+08	2.33178	0.239973	0.0413035	4.39116	4.43892e+09	1.76899e+09	1.17067e+08
0.368	0	25	300	1.10388	0.699002	0.26158	-0.267567	1.65737	0.905906	0.525008	0.0491948	-0.014026	5.12232	4.27671e+07	5.887e+06	2.40917e+06	0.3416	0.0334015	0.0181681	4.91772	1.94312e+07	3.21313e+06	728541
0.739	0.4	45	300	3.8766	3.07347	0.577376	-1.21023	4.27998	3.07319	5.66923	1.16892	0.0584933	2.93656	2.04755e+10	1.92795e+09	2.47978e+08	3.72078	0.667482	0.0729883	3.56912	7.19307e+09	8.50112e+08	7.05175e+07
0.632	0.2	45	300	2.78763	2.18051	0.388683	-0.699756	2.92631	1.81263	3.80294	0.686318	0.0186182	3.11791	7.31159e+09	9.8807e+08	1.22413e+08	2.44832	0.404787	0.0395378	3.68608	2.67398e+09	3.78062e+08	4.6696e+07
0.326	0.01	45	300	1.74585	1.25523	0.277648	-0.443808	1.98602	1.09965	1.67974	0.0990813	-10.1128	284.242	1.20222e+09	1.08094e+08	1.47571e+07	0.830547	0.0508816	0.056079	8.96809	1.87302e+08	3.11297e+07	8.45463e+06
0.911	1.2	25	100	10.3387	8.32485	2.34702	-1.76393	5.15051	9.885	10.3145	3.06753	0.0587973	3.01976	1.50141e+11	7.89273e+09	5.53331e+09	9.60889	1.39185	0.134227	3.68905	3.21857e+10	7.64536e+09	1.55298e+09
0.699	0.2	25	100	2.2651	1.71556	0.356285	-0.640026	2.78873	1.82454	5.97718	1.06929	0.132476	3.19483	1.74761e+10	3.75108e+09	7.04763e+08	3.63564	0.599996	0.011322	3.33823	5.6045e+09	2.09693e+09	2.02667e+08
0.43	0.01	25	100	1.22825	0.749697	0.262684	-0.297112	1.71169	0.941207	1.34217	0.122037	-0.00864021	4.91482	8.94957e+08	1.41195e+08	3.42341e+07	0.75631	0.0665682	0.0718636	4.57418	2.61032e+08	6.63062e+07	1.39107e+07
0.448	0	25	100	1.20937	0.697566	0.262374	-0.282196	1.70929	1.22812	0.403317	0.0502336	-0.0505474	3.51129	5.61174e+07	6.96752e+06	2.19062e+06	0.209883	0.0267874	0.00191459	3.66038	1.59545e+07	2.41764e+06	659879
0.838	0.4	25	100	3.32493	2.5182	0.62112	-1.1209	3.75543	2.93978	9.14529	1.51454	0.126634	3.26954	3.10412e+10	5.34599e+09	1.21068e+09	4.43957	0.787812	0.0653096	3.36618	8.56026e+09	3.12502e+09	3.07648e+08
0.797	0.4	25	100	3.35161	2.4711	0.671747	-1.13507	3.58753	2.91885	8.84042	1.47568	0.130427	3.32394	3.78566e+10	7.11999e+09	1.52807e+09	4.12447	0.804922	0.0443247	3.42188	1.147e+10	4.26443e+09	3.81208e+08
0.413	0.01	25	100	1.12358	0.719844	0.259395	-0.286628	1.69565	0.875942	0.831916	0.078961	0.0271324	4.82514	4.16974e+08	8.21941e+07	1.58168e+07	0.364159	0.0426848	0.0858777	4.31851	1.1919e+08	2.93525e+07	6.61491e+06
0.375	0	25	100	1.09116	0.700474	0.259463	-0.28438	1.67553	0.854187	0.342748	0.0467461	-0.0349244	3.6495	3.95042e+07	6.10774e+06	1.92497e+06	0.21426	0.0269641	0.046855	3.78024	1.31208e+07	2.16749e+06	642292
0.798	1.2	45	100	7.83684	6.66095	1.27109	-2.32678	8.16798	6.64676	10.3145	2.10102	0.0649538	3.05509	6.89265e+10	6.14885e+09	9.96484e+08	6.83446	1.25306	0.0707265	3.39923	2.50633e+10	3.43765e+09	2.71667e+08
0.784	0.4	45	100	3.60693	2.87561	0.522142	-1.24396	4.51722	2.66354	4.46019	0.927493	0.0423752	2.99535	1.28573e+10	2.09788e+09	3.01429e+08	3.00233	0.587129	0.00173842	3.12951	5.22052e+09	1.06245e+09	1.34538e+08
0.51	0.01	45	100	1.70399	1.23446	0.274115	-0.43694	1.97927	1.08077	0.500093	0.0709806	0.00430665	3.5202	2.71378e+08	4.42069e+07	1.16464e+07	0.415895	0.0423501	0.111916	4.1957	9.90593e+07	1.51681e+07	7.83901e+06
0.38	0	45	100	1.65842	1.20806	0.275997	-0.441148	1.97888	1.03438	0.327305	0.0547555	0.00664139	3.08028	5.06111e+07	5.83206e+06	1.80908e+06	0.315337	0.0289718	0.00539472	5.12286	1.51249e+07	1.84162e+06	1.29971e+06
0.602	0.4	25	100	5.57678	4.19182	1.33815	-1.24939	3.35894	5.13498	10.1636	1.79072	0.0100215	3.36748	4.61201e+10	2.77338e+09	3.20854e+09	5.27336	0.811281	0.044196	4.22268	1.01871e+10	5.15305e+08	3.00656e+09
0.524	0.2	25	100	2.8689	2.29556	0.370625	-0.761463	3.29068	1.76707	5.5244	1.11326	0.0165617	3.19289	1.92684e+10	2.05275e+09	1.4904e+09	3.67301	0.571768	0.0172025	3.68808	5.29081e+09	3.88431e+08	1.52683e+09
0.428	0.05	25	100	1.59521	1.10343	0.282196	-0.313688	2.11609	1.25809	2.66964	0.441758	0.0993154	3.4903	1.3719e+10	2.47218e+09	1.05182e+09	1.87505	0.22916	0.0398767	4.69563	3.95559e+09	3.68612e+08	1.13522e+09
0.323	0	25	100	1.19418	0.76956	0.261911	-0.201487	1.57061	0.881689	1.22833	0.100584	0.0245471	7.18431	2.6025e+08	4.27593e+07	2.04482e+07	0.834724	0.0569451	0.065444	10.2467	9.58927e+07	4.19648e+06	3.08986e+07
0.613	1.2	45	100	9.79522	8.52238	1.74735	-2.54689	8.80028	8.61212	10.3145	2.11418	0.0879414	3.4791	7.2996e+10	5.16463e+09	2.10701e+09	4.38059	0.676089	0.0954393	3.60359	7.3409e+09	8.21807e+08	1.38709e+09
0.493	0.2	45	100	2.87916	2.40435	0.330852	-0.829634	3.29417	1.59509	3.68706	0.5881	0.0476457	3.59679	5.73434e+09	9.90559e+08	1.92278e+08	1.3289	0.227134	-0.00101445	3.64316	8.5807e+08	1.55359e+08	1.67077e+08
0.43	0.05	45	100	1.98393	1.56077	0.257013	-0.165416	1.72426	1.0861	1.14262	0.19547	0.0211334	3.36033	2.55166e+09	5.07594e+08	9.30622e+07	0.699553	0.0878343	0.0399769	3.4936	5.19452e+08	6.74552e+07	1.15767e+08
0.315	0	45	100	1.76022	1.30211	0.258474	-0.157329	1.63169	0.963783	0.295617	0.0346682	0.0282731	3.864	1.80322e+07	2.32022e+06	652953	0.533399	0.0209555	0.0464122	7.3503	6.88718e+06	567669	1.25248e+06
0.523	0.4	45	100	4.04285	3.36027	0.631329	-1.67569	5.43726	3.01942	4.88557	0.878738	0.066993	3.67063	1.26083e+10	1.77314e+09	4.09462e+08	2.27962	0.314772	-0.0196208	4.09296	1.63886e+09	2.96317e+08	3.19679e+08
0.503	0.4	45	100	1.94904	1.52231	0.260685	-0.288955	1.80342	1.06435	0.991102	0.179336	0.0532977	3.33502	2.10239e+09	4.71109e+08	7.12979e+07	0.55088	0.07644	0.00718307	3.48925	3.8337e+08	5.86259e+07	7.94036e+07
0.419	0.05	45	100	1.94904	1.52383	0.25997	-0.287081	1.79256	1.06435	0.991102	0.18028	0.0531303	3.3148	2.08566e+09	4.67363e+08	7.0726e+07	0.55088	0.0767592	0.00722156	3.47241	3.80051e+08	5.81679e+07	7.86948e+07
0.312	0	45	100	1.68921	1.27559	0.255953	-0.248949	1.63013	0.90919	0.222469	0.0314721	0.0294022	3.08993	1.87994e+07	2.20954e+06	575547	0.436947	0.0215541	-0.0463474	8.45829	9.94234e+06	635144	1.72471e+06
0.662	1.2	45	100	9.49147	8.19423	1.52413	-2.51932	8.69462	7.87327	9.50584	1.79182	0.0383681	3.36192	5.12644e+10	3.86853e+09	1.91222e+09	3.44774	0.570135	0.0389721	3.83737	5.24448e+09	4.84794e+08	1.47278e+09
0.513	0.4	45	100	3.87004	3.20018	0.556624	-1.66534	5.57267	2.78996	3.95118	0.830052	0.0322091	3.18304	1.1224e+10	2.16478e+09	4.82853e+08	1.97756	0.318785	-0.00117497	3.86531	1.74737e+09	2.92264e+08	4.37843e+08
0.45	0.05	45	100	1.92769	1.49058	0.253755	-0.223651	1.73433	1.13043	0.929094	0.156342	0.0761169	3.33121	1.73035e+09	4.23478e+08	7.68952e+07	0.611946	0.0758236	0.0234903	3.74212	4.15498e+08	4.80204e+07	1.13752e+08
0.336	0	45	100	1.70317	1.27263	0.256183	-0.221942	1.62123	0.929714	0.234007	0.0335227	0.0473051	3.09407	2.28298e+07	2.95045e+06	814896	0.391368	0.0233947	0.0204085	8.43692	1.2798e+07	761126	2.67202e+06
0.611	0.4	25	100	3.81011	2.85482	0.824474	-1.24151	3.59078	3.45369	5.75671	0.930933	0.0131747	3.46253	1.15638e+10	6.59961e+08	7.79328e+08	3.36904	0.450817	0.0153492	4.68697	2.98253e+09	1.14853e+08	9.5853e+08
0.575	0.2	25	100	2.33077	1.67306	0.419205	-0.780931	3.28811	1.94275	3.124	0.546906	0.0685763	3.52148	5.02442e+09	4.06294e+08	3.78337e+08	2.20435	0.276667	0.00922179	4.7424	1.39838e+09	6.04717e+07	4.32247e+08
0.379	0.01	25	100	1.19295	0.761832	0.258194	-0.109351	1.54388	0.915758	0.589833	0.0662824	-0.0833749	4.29327	2.4464e+08	2.86389e+07	1.67806e+07	0.334031	0.0372722	0.0103113	4.31717	7.6841e+07	3.13031e+06	2.16266e+07
0.272	0	25	100	1.1203	0.713331	0.259945	-0.165602	1.54491	0.853777	0.172957	0.0284873	-0.0180745	3.27609	1.62407e+07	2.16042e+06	830974	0.281234	0.0187647	-0.0347415	4.9494	7.21987e+06	451847	1.16977e+06
0.3	1.2	45	300	3.70831	2.71694	0.677153	-0.7203	2.68442	2.92172	4.49881	0.802081	0.0426635	3.27488	1.08576e+10	6.2258e+08	3.17473e+08	1.92636	0.318688	0.0198509	3.7766	1.75435e+09	2.50892e+08	1.82865e+08
0.322	0.2	45	300	2.49866	1.9513	0.322553	-0.501024	2.29859	1.35414	2.61366	0.476816	0.0925858	3.1334	4.50752e+09	5.46425e+08	1.46515e+08	1.34016	0.223733	-0.0988699	3.34534	1.00426e+09	1.92088e+08	1.06408e+08
0.194	0.01	45	300	1.85011	1.33167	0.280127	-0.469335	2.03982	1.15629	1.27652	0.160213	-0.0414626	3.67784	1.89296e+09	3.58483e+08	5.68487e+07	0.779151	0.08233	0.0753135	3.78972	5.08959e+08	1.03693e+08	5.78949e+07
0.186	0	45	300	1.6576	1.20118	0.272345	-0.439736	1.9598	1.05573	0.334765	0.0595907	0.00627225	3.07662	5.9091e+07	5.15892e+06	1.60144e+06	0.390746	0.0279531	-0.012458	5.47762	1.41316e+07	1.35577e+06	1.75952e+06
0.453	0.4	45	300	5.91418	4.44755	1.19153	-1.25824	3.61529	5.12226	6.43357	1.1133	0.0162526	3.43689	2.05054e+10	7.38723e+08	5.93808e+08	2.69694	0.44668	0.017781	3.84653	3.35955e+09	3.24061e+08	4.3293e+08
0.296	0.4	45	300	2.26099	1.75044	0.300411	-0.499868	2.24181	1.27902	2.32833	0.356301	0.0861159	3.38256	2.19408e+09	3.39254e+08	7.34782e+07	1.11792	0.188622	-0.0671099	3.54471	6.21165e+08	1.14571e+08	8.92826e+07
0.203	0.01	45	300	1.77746	1.29244	0.277944	-0.452207	2.00402	1.10088	0.839186	0.111921	-0.0906508	3.80134	9.32235e+08	1.84236e+08	2.9502e+07	0.48391	0.0594622	0.057374	3.99244	2.68973e+08	4.79454e+07	4.00527e+07
0.166	0	45	300	1.69783	1.21219	0.274233	-0.445294	1.95296	1.0623	0.350052	0.0626899	-0.0288908	3.16892	7.49843e+07	7.76105e+06	2.29032e+06	0.273738	0.0276784	0.0180961	4.83123	1.54641e+07	2.13391e+06	1.86703e+06
0.291	1.2	25	300	2.93622	2.15851	0.473808	-0.570591	2.66178	2.1484	3.0556	0.591919	0.0393987	3.24598	5.28424e+09	3.41468e+08	2.76672e+08	1.91548	0.269785	0.08122	3.79022	1.1396e+09	3.08636e+08	1.09802e+08
0.263	0.4	25	300	2.60168	1.87434	0.389177	-0.490922	2.57041	1.88693	2.52799	0.410822	0.072604	3.5112	2.71921e+09	2.8624e+08	1.07054e+08	1.22872	0.198642	-0.00479902	3.85329	6.51544e+08	1.03584e+08	1.10713e+08
0.212	0.01	25	300	1.77992	1.28761	0.279635	-0.464239	1.97962	1.08569	1.73919	0.138063	-1.12159	13.5755	1.43142e+09	1.45284e+08	4.30188e+07	0.796603	0.0845213	-1.29338	15.9273	6.66169e+08	4.46014e+07	3.08643e+07
0.163	0	25	300	1.66951	1.20562	0.273708	-0.432505	1.97613	1.09472	0.691605	0.0690248	-0.0194463	3.61227	8.74e+07	8.21009e+06	2.9897e+06	0.380594	0.0295386	0.0253877	5.92354	1.72848e+07	2.2566e+06	2.17873e+06
0.356	0.4	45	300	5.19134	4.09282	0.943955	-1.35735	4.22682	4.13795	4.76155	0.94015	-0.00827227	3.2732	1.41942e+10	6.25878e+08	4.83004e+08	2.73986	0.408451	0.00182753	4.08197	2.82084e+09	2.5992e+08	5.02108e+08
0.287	0.2	45	300	2.39768	1.84311	0.339488	-0.515659	2.40532	1.55691	2.10334	0.376529	0.065124	3.34108	2.39931e+09	3.13477e+08	8.70707e+07	1.06657	0.191833	-0.0491647	3.63326	6.36894e+08	1.11591e+08	9.98922e+07
0.189	0.05	45	300	1.86284	1.26016	0.280121	-0.41335	2.01382	1.21212	1.49525	0.0925395	0.0203132	8.32591	6.34602e+08	1.09028e+08	2.53134e+07	0.793762	0.0475944	-0.0293905	12.9233	1.92713e+08	2.68768e+07	3.17748e+07
0.175	0	45	300	1.66704	1.20491	0.271889	-0.432792	1.9436	1.05819	0.470172	0.0701664	0.00895284	3.19628	8.75448e+07	7.32512e+06	2.34878e+06	0.373891	0.0290641	-0.0107663	5.64934	1.64576e+07	1.72574e+06	2.19821e+06
0.338	1.2	45	300	3.56588	2.40539	0.750296	-0.39256	1.94171	2.75261	4.74647	0.729033	0.0595388	3.95934	7.53686e+09	3.56737e+08	2.53382e+08	1.6572	0.278013	0.0405474	4.04061	1.10793e+09	1.75481e+08	8.301e+07
0.229	0.2	45	300	2.51549	1.97167	0.303278	-0.29338	2.30905	1.30653	3.03687	0.494443	0.0560238	3.28055	4.57056e+09	4.2878e+08	1.80645e+08	1.43067	0.230723	-0.0908877	3.33443	1.00898e+09	2.01334e+08	7.0024e+07
0.194	0.05	45	300	2.07177	1.45547	0.257961	-0.163084	1.87746	1.19159	2.12287	0.227417	0.0218417	4.42819	3.4917e+09	5.12067e+08	1.3765e+08	1.19973	0.114331	-0.156411	4.43523	8.88532e+08	1.84103e+08	6.36416e+07
0.165	0	45	300	1.63092	1.2105	0.248383	-0.213571	1.60123	0.875942	0.401701	0.0714523	0.0189446	3.10675	8.55459e+07	6.81075e+06	2.71462e+06	0.343442	0.0290714	-0.0642185	5.27968	1.45288e+07	1.68925e+06	867225
0.665	0.4	45	300	3.84623	3.16271	0.587171	-1.57598	5.15306	2.92665	3.71892	0.806286	0.0362465	3.25824	9.37919e+09	1.72245e+09	3.46069e+08	2.23131	0.296871	0.000290522	4.00347	1.32909e+09	2.32398e+08	3.08297e+08
0.64	0.4	45	300	3.95213	3.2259	0.619929	-1.70355	5.55734	3.01613	3.79985	0.819943	0.0119456	3.22164	1.09799e+10	2.07294e+09	3.97935e+08	2.50435	0.301991	-0.00543226	4.29683	1.56954e+09	2.73759e+08	3.64424e+08
0.444	0.05	45	300	1.96792	1.48556	0.258662	-0.312715	1.78957	1.19488	1.64839	0.19152	-1.41531	16.2567	3.0915e+09	5.91142e+08	1.008e+08	0.944166	0.0806891	0.0288704	4.87601	4.72441e+08	6.40115e+07	1.17202e+08
0.37	0	45	300	1.775	1.25476	0.263308	-0.35517	1.81833	1.15506	0.526289	0.0412471	0.00541143	5.36101	3.57484e+07	5.20172e+06	1.72944e+06	2.26412	0.147428	-5.53501	55.3148	3.5356e+09	1.3433e+06	3.72465e+06
0.758	1.2	45	300	8.82486	7.55722	1.63571	-2.35606	7.74978	7.77803	8.37067	1.70715	0.0131243	3.26254	4.81803e+10	3.66677e+09	1.53076e+09	4.50138	0.611585	-0.00231212	3.74273	6.2676e+09	5.17721e+08	1.65001e+09
0.672	0.4	45	300	3.90657	3.28351	0.596729	-1.72567	5.63923	2.8893	3.96934	0.864732	0.00404076	3.2256	1.22671e+10	2.48584e+09	4.22171e+08	2.06051	0.380533	0.043284	3.3954	2.4077e+09	4.29061e+08	4.32549e+08
0.485	0.05	45	300	1.94616	1.50611	0.254546	-0.280936	1.69522	1.07338	1.71229	0.200308	-0.0163417	3.69052	2.1332e+09	5.69785e+08	8.31231e+07	1.77622	0.153045	-9.2427	112.786	6.61349e+09	8.5352e+07	8.47353e+07
0.39	0	45	300	1.67566	1.25607	0.256936	-0.255221	1.63257	0.93505	0.560806	0.0416552	0.0241049	3.52737	3.14584e+07	3.93015e+06	1.04359e+06	5.67445	0.724862	-0.672749	7.38075	3.04173e+10	2.17064e+06	1.59274e+06
0.794	0.8	35	200	7.09388	5.77471	1.3599	-1.88731	5.6707	6.27405	7.64696	1.45583	0.00320042	3.27278	3.08999e+10	1.41516e+09	2.13815e+09	4.93026	0.820209	0.00490716	3.58812	1.00171e+10	5.5873e+08	2.5543e+09
0.7	0.3	35	200	3.20672	2.55748	0.458678	-1.3029	4.5885	2.37128	3.58308	0.707732	0.0136642	3.09457	7.95579e+09	6.83853e+08	6.2121e+08	2.48991	0.429647	0.0362952	3.38856	3.0057e+09	3.05472e+08	6.15322e+08
0.46	0.03	35	200	1.57551	1.08589	0.257018	-0.158436	1.65037	1.02535	0.99302	0.140846	-0.0988107	3.37849	1.16748e+09	2.99222e+08	4.00171e+07	0.55862	0.0864551	0.116495	3.44305	4.46197e+08	1.04302e+08	3.9982e+07
0.4	0	35	200	1.40147	0.957755	0.259364	-0.216102	1.61201	0.915758	0.467099	0.0472476	-0.0923033	3.99442	4.40038e+07	7.09504e+06	2.11645e+06	0.252997	0.0288275	0.0457562	3.79768	1.6242e+07	3.15704e+06	1.14146e+06
0.889	0.8	25	200	7.40256	5.93327	1.62899	-1.57988	4.47554	6.66728	10.3145	1.84927	0.0696059	3.43385	4.63926e+10	1.68915e+09	2.31445e+09	5.26643	0.886433	0.0316018	3.37307	1.06245e+10	6.11088e+08	2.58714e+09
0.751	0.3	25	200	2.99656	2.40625	0.412836	-0.984744	3.84591	2.03388	4.48948	0.912709	0.0518873	2.95396	1.17568e+10	8.32496e+08	8.94317e+08	2.88536	0.519055	0.0528048	3.37467	3.91173e+09	3.52902e+08	7.85308e+08
0.519	0.03	25	200	1.32759	0.867124	0.260823	-0.169059	1.63835	1.07256	1.42688	0.167246	-0.0651827	5.25188	2.21088e+09	1.9967e+08	1.69265e+08	1.17714	0.0984041	0.15732	5.58394	7.65994e+08	6.16843e+07	1.22981e+08
0.406	0	25	200	1.10798	0.707821	0.260454	-0.0869782	1.53435	0.827917	0.251489	0.0349284	0.0255504	3.37947	2.51925e+07	3.65881e+06	1.57981e+06	0.17202	0.0216392	0.0119074	3.49402	9.72431e+06	1.66714e+06	625449
0.867	0.8	45	200	6.38048	5.3971	1.17433	-2.09626	6.52495	5.34392	7.28961	1.46476	-0.0170134	3.37116	3.29688e+10	3.08825e+09	8.52895e+08	3.75603	0.643703	0.0640255	3.26226	6.33592e+09	9.72898e+08	8.51856e+08
0.63	0.3	45	200	3.26624	2.75284	0.376416	-1.15568	4.42526	2.00597	4.14777	0.797896	-0.00355729	3.25159	9.45885e+09	1.89213e+09	2.32296e+08	2.09469	0.407871	0.0437297	3.28364	2.49161e+09	6.38182e+08	2.05924e+08
0.463	0.03	45	200	1.885	1.37311	0.253567	-0.163567	1.63699	1.01673	0.729119	0.125891	-0.0584154	3.135	1.11091e+09	2.91502e+08	3.77951e+07	0.485867	0.0713469	-0.021207	3.50091	3.71448e+08	8.60425e+07	3.37557e+07
0.418	0	45	200	1.67197	1.25329	0.257341	-0.267216	1.62587	0.889077	0.329033	0.0431933	0.0131265	3.38273	3.29535e+07	5.50117e+06	908182	0.303266	0.0287799	0.00134216	4.03541	1.50578e+07	2.20768e+06	1.03869e+06
0.358	0.8	35	200	5.89284	4.69725	1.21405	-1.46197	4.02462	4.89281	6.47576	1.2722	0.0375033	3.1497	2.41494e+10	6.50707e+08	6.8025e+08	3.39316	0.485006	0.041193	3.88844	3.64478e+09	3.32287e+08	2.37798e+08
0.258	0.3	35	200	2.25155	1.83417	0.244302	-0.217126	1.70638	0.981844	2.36214	0.401826	0.0478309	3.31127	2.69199e+09	3.43674e+08	1.04307e+08	0.944908	0.201226	-0.0857695	3.07689	6.61095e+08	1.44676e+08	5.21954e+07
0.201	0.03	35	200	1.81071	1.38995	0.248841	-0.20653	1.65859	0.967887	1.19427	0.180457	0.0222735	3.42856	1.99452e+09	4.05263e+08	7.99523e+07	0.533133	0.0974537	-0.124098	3.26742	5.74272e+08	1.27623e+08	4.79692e+07
0.168	0	35	200	1.67731	1.22763	0.248064	-0.191953	1.60433	0.903854	0.649678	0.0833248	-0.0191419	3.40715	1.12903e+08	1.24118e+07	4.32034e+06	0.33081	0.0345864	-0.0559323	4.4564	2.05536e+07	3.22445e+06	1.72399e+06
0.31	0.8	35	200	2.91036	2.09678	0.4618	-0.64043	2.7121	2.1915	2.75329	0.418377	0.0166465	3.8573	2.77432e+09	3.15803e+08	1.58527e+08	1.49784	0.236375	-0.0312864	3.80894	8.76296e+08	1.52139e+08	9.47237e+07
0.245	0.3	35	200	2.46089	1.92992	0.323787	-0.551665	2.77979	1.51176	2.11026	0.376563	0.0309309	3.39724	2.0856e+09	3.12182e+08	9.3341e+07	1.20479	0.207012	-0.0672838	3.2171	6.14657e+08	1.43392e+08	5.0395e+07
0.186	0.03	35	200	2.00609	1.34822	0.257344	-0.337207	1.92702	1.74039	0.96832	0.142612	0.0102819	3.62535	1.47125e+09	3.46929e+08	6.19894e+07	0.509555	0.079643	-0.141014	3.56894	4.56342e+08	1.10176e+08	4.02093e+07
0.153	0	35	200	1.61368	1.2165	0.254241	-0.327628	1.60765	0.849262	0.392178	0.0674735	-0.0148658	3.24893	6.73942e+07	8.87119e+06	2.69797e+06	0.41283	0.0318126	-0.00953717	5.18396	1.57108e+07	2.05839e+06	1.1897e+06
0.36	0.8	35	200	5.0797	4.18425	0.746302	-1.57575	5.01678	3.75786	4.1579	0.878532	0.0361981	2.99301	1.12711e+10	5.85647e+08	4.4966e+08	2.22575	0.389809	-0.0223425	3.25588	2.24005e+09	2.91574e+08	2.16507e+08
0.249	0.3	35	200	2.35786	1.85494	0.283367	-0.303156	2.35093	1.31227	2.12881	0.341114	0.0446374	3.39759	1.64228e+09	2.67333e+08	7.19321e+07	1.09983	0.196141	-0.0671686	3.22626	5.2981e+08	1.23286e+08	4.57304e+07
0.18	0.03	35	200	2.02333	1.34615	0.253919	-0.176887	1.79318	1.3369	2.78895	0.178349	-4.05018	59.4096	4.24323e+09	2.89692e+08	5.66214e+07	1.04182	0.078221	-0.168603	6.48925	4.03518e+08	9.44379e+07	2.76502e+07
0.182	0	35	200	1.62559	1.21229	0.249483	-0.187684	1.61535	0.864039	0.644782	0.0691358	-0.00929269	3.43092	7.82337e+07	9.33448e+06	2.78741e+06	0.359399	0.0303545	-0.011964	4.23975	1.55242e+07	2.11276e+06	941880
